# Supplementary material for: Brazilian Food Truck Consumers’ Profile, Choices, Preferences, and Food Safety Importance Perception
Source: Nutrients. 2019 May 25;11(5):1175. doi: 10.3390/nu11051175 (PMC6566650; doi:10.3390/nu11051175)
Supplement: Supplementary file 1 [file nutrients-11-01175-s001.pdf]

## FOOD TRUCK CONSUMER QUESTIONNAIRE

|                     |                     |
|---------------------|---------------------|
| <b>Name:</b>        | <b>Email/Phone:</b> |
| <b>Number/Year:</b> |                     |

| SOCIO-DEMOGRAPHIC STATUS                                                                                                                                                                                                |
|-------------------------------------------------------------------------------------------------------------------------------------------------------------------------------------------------------------------------|
| <b>1. Age</b>                                                                                                                                                                                                           |
| <input type="checkbox"/> ≤30<br><input type="checkbox"/> 31-50<br><input type="checkbox"/> >50                                                                                                                          |
| <b>2. Gender</b>                                                                                                                                                                                                        |
| <input type="checkbox"/> Male<br><input type="checkbox"/> Female                                                                                                                                                        |
| <b>3. Marital status</b>                                                                                                                                                                                                |
| <input type="checkbox"/> With Companion (Married)<br><input type="checkbox"/> Without Companion (Single/Divorced/Widowed)                                                                                               |
| <b>4. Children</b>                                                                                                                                                                                                      |
| <input type="checkbox"/> Yes<br><input type="checkbox"/> No                                                                                                                                                             |
| <b>5. Level of education</b>                                                                                                                                                                                            |
| <input type="checkbox"/> Secondary (High School)<br><input type="checkbox"/> Tertiary (Graduate)<br><input type="checkbox"/> Quaternary (Postgraduate)                                                                  |
| <b>6. Food safety training</b>                                                                                                                                                                                          |
| <input type="checkbox"/> Yes<br><input type="checkbox"/> No                                                                                                                                                             |
| <b>7. Occupation status</b>                                                                                                                                                                                             |
| <input type="checkbox"/> Employed<br><input type="checkbox"/> Unemployed or Retired                                                                                                                                     |
| <b>8. Monthly income (minimum wage; US\$)</b>                                                                                                                                                                           |
| <input type="checkbox"/> Not declared<br><input type="checkbox"/> No income<br><input type="checkbox"/> ≤4 ( US\$ 980)<br><input type="checkbox"/> 5-8 (US\$ 1,225 - 1,960)<br><input type="checkbox"/> ≥9 (US\$ 2,206) |
| CHOICES AND PREFERENCES                                                                                                                                                                                                 |
| <b>1. Frequency of consumption (per week)</b>                                                                                                                                                                           |
| <input type="checkbox"/> 1-2 times<br><input type="checkbox"/> 3-4 times<br><input type="checkbox"/> ≥5 times                                                                                                           |

|                                                                                                                                                                                                                                                                                                                                                                                                                                                            |
|------------------------------------------------------------------------------------------------------------------------------------------------------------------------------------------------------------------------------------------------------------------------------------------------------------------------------------------------------------------------------------------------------------------------------------------------------------|
| <b>2. Place of consumption</b>                                                                                                                                                                                                                                                                                                                                                                                                                             |
| <input type="checkbox"/> Near home<br><input type="checkbox"/> Near work<br><input type="checkbox"/> Near university<br><input type="checkbox"/> Other                                                                                                                                                                                                                                                                                                     |
| <b>3. Eating service</b>                                                                                                                                                                                                                                                                                                                                                                                                                                   |
| <input type="checkbox"/> Eat in<br><input type="checkbox"/> Takeout<br><input type="checkbox"/> Both                                                                                                                                                                                                                                                                                                                                                       |
| <b>4. Time of consumption</b>                                                                                                                                                                                                                                                                                                                                                                                                                              |
| <input type="checkbox"/> Daytime<br><input type="checkbox"/> Nighttime                                                                                                                                                                                                                                                                                                                                                                                     |
| <b>5. Company</b>                                                                                                                                                                                                                                                                                                                                                                                                                                          |
| <input type="checkbox"/> Family<br><input type="checkbox"/> Friends<br><input type="checkbox"/> Alone                                                                                                                                                                                                                                                                                                                                                      |
| <b>6. Preferred type of food</b>                                                                                                                                                                                                                                                                                                                                                                                                                           |
| <input type="checkbox"/> Hamburgers and sandwiches<br><input type="checkbox"/> Pizza and pasta<br><input type="checkbox"/> Barbecue<br><input type="checkbox"/> Meat and fish<br><input type="checkbox"/> Other                                                                                                                                                                                                                                            |
| <b>7. Average expenditure on food (US\$/per capita/per purchase)</b>                                                                                                                                                                                                                                                                                                                                                                                       |
| <input type="checkbox"/> <US\$ 2.57<br><input type="checkbox"/> US\$ 2.57 - 5.14<br><input type="checkbox"/> US\$ 5.14 - 7.71<br><input type="checkbox"/> US\$ 7.71 - 10.27<br><input type="checkbox"/> US\$ 10.27 - 12.84<br><input type="checkbox"/> > US\$ 12.85                                                                                                                                                                                        |
| <b>8. Reason to choose a food truck</b>                                                                                                                                                                                                                                                                                                                                                                                                                    |
| <input type="checkbox"/> Affordable<br><input type="checkbox"/> Saving time<br><input type="checkbox"/> Accessibility/Convenience<br><input type="checkbox"/> Service quality<br><input type="checkbox"/> Variety of options<br><input type="checkbox"/> Taste<br><input type="checkbox"/> Possibility to eat at any time<br><input type="checkbox"/> Food hygiene<br><input type="checkbox"/> Nutritional value<br><input type="checkbox"/> Entertainment |
| <b>9. Reason not to choose a food truck</b>                                                                                                                                                                                                                                                                                                                                                                                                                |
| <input type="checkbox"/> Poor vehicle hygiene<br><input type="checkbox"/> Long queues<br><input type="checkbox"/> Insufficient number of vendors<br><input type="checkbox"/> Solo dining<br><input type="checkbox"/> Poor nutritional value                                                                                                                                                                                                                |

|                                                                                                                                                                                                                                 |
|---------------------------------------------------------------------------------------------------------------------------------------------------------------------------------------------------------------------------------|
| <input type="checkbox"/> Limited options<br><input type="checkbox"/> Poor food hygiene                                                                                                                                          |
| <b>10. Do you consider food hygiene when eating from food trucks?</b>                                                                                                                                                           |
| <input type="checkbox"/> Always<br><input type="checkbox"/> Most of the times<br><input type="checkbox"/> Sometimes<br><input type="checkbox"/> Rarely<br><input type="checkbox"/> Never                                        |
| <b>11. Do you consider vendors' personal hygiene when eating from food trucks?</b>                                                                                                                                              |
| <input type="checkbox"/> Always<br><input type="checkbox"/> Most of the times<br><input type="checkbox"/> Sometimes<br><input type="checkbox"/> Rarely<br><input type="checkbox"/> Never                                        |
| <b>FOOD SAFETY IMPORTANCE PERCEPTION</b>                                                                                                                                                                                        |
| <b>1. Is it important if the food handler wears gloves?</b>                                                                                                                                                                     |
| <input type="checkbox"/> Extremely important<br><input type="checkbox"/> Very Important<br><input type="checkbox"/> Indifferent<br><input type="checkbox"/> Slightly important<br><input type="checkbox"/> Not at all important |
| <b>2. Is it important if the food handler wears a mask?</b>                                                                                                                                                                     |
| <input type="checkbox"/> Extremely important<br><input type="checkbox"/> Very Important<br><input type="checkbox"/> Indifferent<br><input type="checkbox"/> Slightly important<br><input type="checkbox"/> Not at all important |
| <b>3. Is it important if the food handler wears a hair covering (a hair net or a cap)?</b>                                                                                                                                      |
| <input type="checkbox"/> Extremely important<br><input type="checkbox"/> Very Important<br><input type="checkbox"/> Indifferent<br><input type="checkbox"/> Slightly important<br><input type="checkbox"/> Not at all important |
| <b>4. Is it important if there is a hand sink, with hand soap and paper towels available for the food handler for handwashing?</b>                                                                                              |
| <input type="checkbox"/> Extremely important<br><input type="checkbox"/> Very Important<br><input type="checkbox"/> Indifferent<br><input type="checkbox"/> Slightly important<br><input type="checkbox"/> Not at all important |
| <b>5. Is it important if the food handler does not wear adornments or jewelry?</b>                                                                                                                                              |
| <input type="checkbox"/> Extremely important<br><input type="checkbox"/> Very Important<br><input type="checkbox"/> Indifferent                                                                                                 |

|                                                                                                                                                                                                                                 |
|---------------------------------------------------------------------------------------------------------------------------------------------------------------------------------------------------------------------------------|
| <input type="checkbox"/> Slightly important<br><input type="checkbox"/> Not at all important                                                                                                                                    |
| <b>6. Is it important if money is exclusively handled by the cashier?</b>                                                                                                                                                       |
| <input type="checkbox"/> Extremely important<br><input type="checkbox"/> Very Important<br><input type="checkbox"/> Indifferent<br><input type="checkbox"/> Slightly important<br><input type="checkbox"/> Not at all important |
| <b>7. Is it important if all waste collectors of the preparation area are capped?</b>                                                                                                                                           |
| <input type="checkbox"/> Extremely important<br><input type="checkbox"/> Very Important<br><input type="checkbox"/> Indifferent<br><input type="checkbox"/> Slightly important<br><input type="checkbox"/> Not at all important |
| <b>8. Is it important if there are no vectors or pests in the preparation area?</b>                                                                                                                                             |
| <input type="checkbox"/> Extremely important<br><input type="checkbox"/> Very Important<br><input type="checkbox"/> Indifferent<br><input type="checkbox"/> Slightly important<br><input type="checkbox"/> Not at all important |
| <b>9. Is it important if hot food is served hot?</b>                                                                                                                                                                            |
| <input type="checkbox"/> Extremely important<br><input type="checkbox"/> Very Important<br><input type="checkbox"/> Indifferent<br><input type="checkbox"/> Slightly important<br><input type="checkbox"/> Not at all important |
| <b>10. Is it important if cold food is served cold?</b>                                                                                                                                                                         |
| <input type="checkbox"/> Extremely important<br><input type="checkbox"/> Very Important<br><input type="checkbox"/> Indifferent<br><input type="checkbox"/> Slightly important<br><input type="checkbox"/> Not at all important |
